# Supplementary material
Source: HighWire-hosted journal article supplement (https://www.cmaj.ca/highwire/filestream/59065/field_highwire_adjunct_files/0/sofo-rolland-1-at.pdf)
Supplement: sofo-rolland-1-at.pdf [file sofo-rolland-1-at.pdf]

**Appendix 1: Phase III published trials of sofosbuvir in combination with ribavirin or peginterferon–ribavirin for the treatment of hepatitis C virus (HCV) infection**

| Trial                 | Study design                                                        | Mean age (years) | Genotype (s) | N   | Study population                                                       | Proportion of cirrhotic patients | Treatment regimens     | Treatment durations   | SVR12      |
|-----------------------|---------------------------------------------------------------------|------------------|--------------|-----|------------------------------------------------------------------------|----------------------------------|------------------------|-----------------------|------------|
| NEUTRINO <sup>1</sup> | Single-group, open-label                                            | 52               | 1,4,5,6      | 327 | Treatment naïve                                                        | 17%                              | SOF+ IFN + RBV         | 12 weeks              | 90%        |
| FISSION <sup>1</sup>  | Randomized, open-label, active-control                              | 48               | 2            | 499 | Treatment naïve                                                        | 20%                              | SOF+RBV<br>IFN + RBV   | 12 weeks<br>24 weeks  | 97%<br>78% |
|                       |                                                                     |                  | 3            |     |                                                                        |                                  | SOF+RBV<br>IFN + RBV   | 12 weeks<br>24 weeks  | 56%<br>63% |
| POSITRON <sup>2</sup> | Blinded, placebo-controlled                                         | 52               | 2,3          | 278 | Interferon intolerant or ineligible; Naïve or experienced to treatment | 16%                              | SOF+RBV<br>Placebo     | 12 weeks<br>12 weeks  | 78%<br>0%  |
| FUSION <sup>2</sup>   | Blinded, active-control                                             | 54               | 2,3          | 201 | Treatment experienced                                                  | 30%                              | SOF + RBV<br>SOF + RBV | 12 weeks<br>16 weeks  | 50%<br>73% |
| VALENCE <sup>3</sup>  | Initially blinded, randomized, then protocol amended and open label | 50               | 2,3          | 419 | Naïve or experienced to treatment                                      | 21%                              | SOF + RBV              | 12 weeks (genotype 2) | 93%        |
|                       |                                                                     |                  |              |     |                                                                        |                                  |                        | 24 weeks (genotype 3) | 85%        |

**Note:** SOF, sofosbuvir; IFN, peginterferon; RBV, ribavirin; SVR, sustained virologic response.

## References

1. Lawitz E, Mangia A, Wyles D, et al. Sofosbuvir for previously untreated chronic hepatitis C infection. *N Engl J Med* 2013;368:1878-87.
2. Jacobson IM, Gordon SC, Kowdley KV, et al. Sofosbuvir for hepatitis C genotype 2 or 3 in patients without treatment options. *N Engl J Med* 2013;368:1867-77.
3. Zeuzem S, Dusheiko GM, Salupere R, et al. Sofosbuvir and ribavirin in HCV genotypes 2 and 3. *N Engl J Med* 2014;370(21):1993-2001.
